# Supplementary material
Source: HighWire-hosted journal article supplement (https://erj.ersjournals.com/content/59/1/2003639)
Supplement: inline-supplementary-material-3 [file inline-supplementary-material-3.pdf]

**Supplementary Figure S1. The DLCO<sub>cor</sub> trajectories are visualised for patients diagnosed with double lung transplant (n=1201) versus those single lung transplant (n=222). The trendline for each group is added with 95% confidence error bars. Lower values are observed after single lung transplant compared with double lung transplant.**

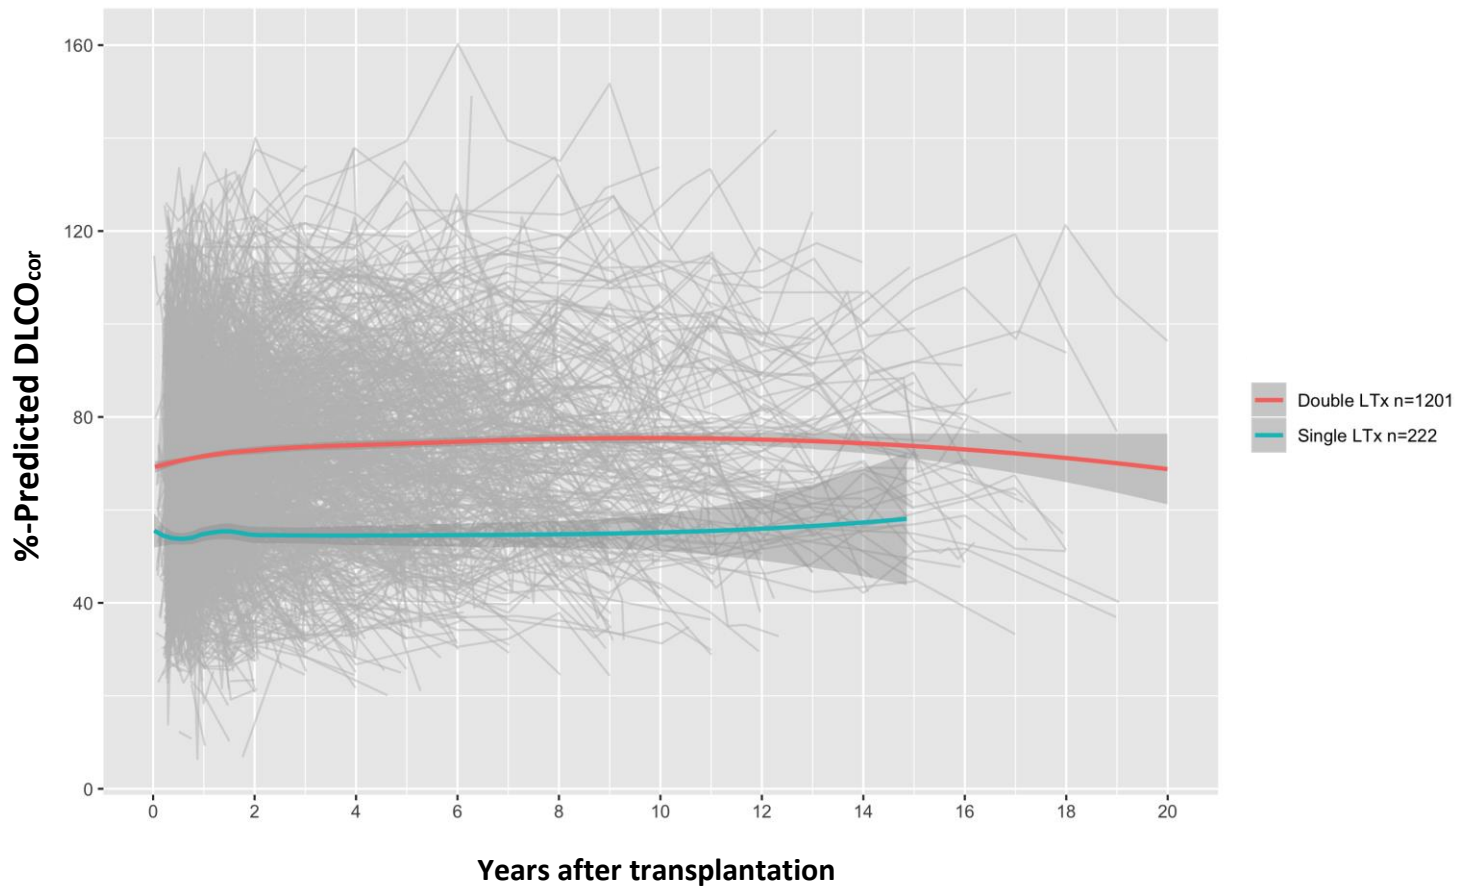

Supplementary Figure S2. Tukey box plots for %-Predicted DLCO<sub>cor</sub> at CLAD onset (+/- 30 days) for each CLAD phenotype with BOS (n=22), Mixed (n=3), RAS (n=5), Unclassified (n=7) and Undefined (n=3). There is a significant difference between phenotypes, with lowest values in the RAS and Undefined groups.

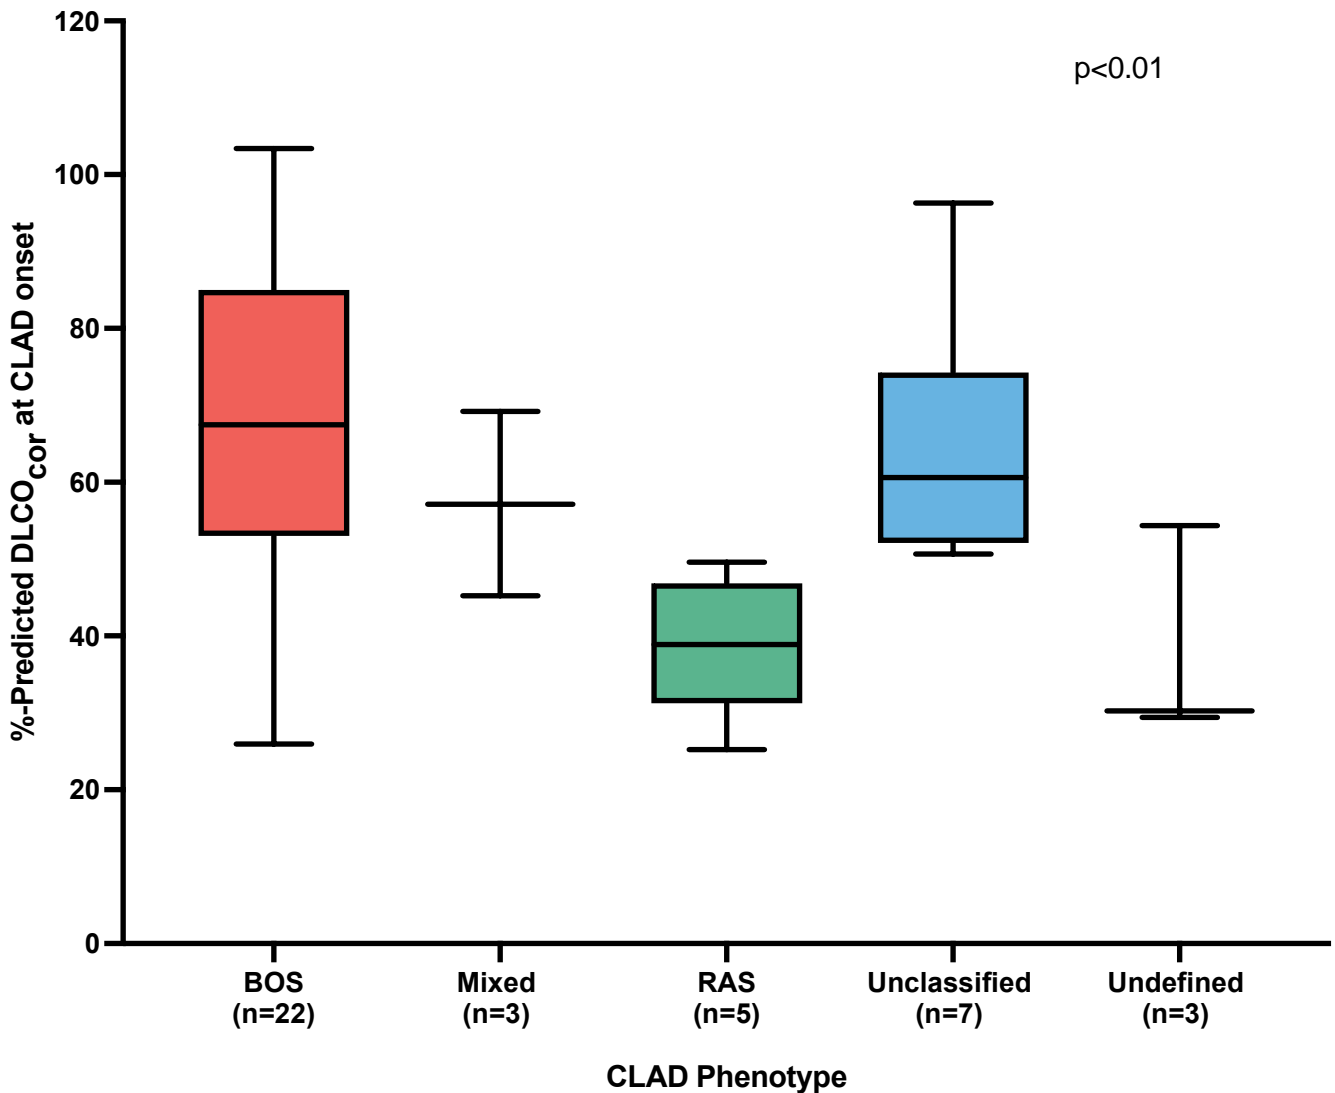

Abbreviations: CLAD = chronic lung allograft dysfunction; BOS = bronchiolitis obliterans syndrome; RAS = restrictive allograft syndrome. Boxes represent median with inter-quartile range.
