# Supplementary material
Source: HighWire-hosted journal article supplement (https://erj.ersjournals.com/content/59/1/2003639)
Supplement: inline-supplementary-material-4 [file inline-supplementary-material-4.pdf]

**Supplementary Figure S3A. Kaplan-Meier curves for 4 groups demonstrating the relative contribution of low or normal baseline FVC and DLCO<sub>cor</sub> on CLAD-free survival. Dashed lines indicate median survival. Among patients with normal baseline FVC, those with low baseline DLCO<sub>cor</sub> had reduced CLAD-free survival compared to those with normal baseline DLCO<sub>cor</sub>.**

**3B. Kaplan-Meier curves for 4 groups demonstrating the relative contribution of low or normal baseline FVC and DLCO<sub>cor</sub> on graft survival. Dashed lines indicate median survival. Among patients with normal baseline FVC, patients with low baseline DLCO<sub>cor</sub> showed significantly worse survival than patients with normal baseline DLCO<sub>cor</sub>.**

**Supplementary Figure 3A.**

- +— Low Baseline FVC and Low Baseline DLCO<sub>cor</sub> (n=284)
- +— Low Baseline FVC and Normal Baseline DLCO<sub>cor</sub> (n=103)
- +— Normal Baseline FVC and Low Baseline DLCO<sub>cor</sub> (n=139)
- +— Normal Baseline FVC and Normal Baseline DLCO<sub>cor</sub> (n=580)

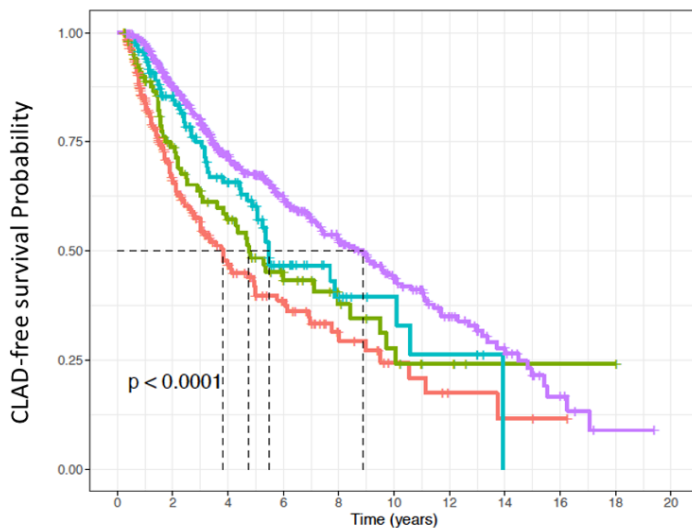

Number at risk

|     |     |     |     |     |     |    |    |    |   |   |   |
|-----|-----|-----|-----|-----|-----|----|----|----|---|---|---|
| —+— | 284 | 106 | 53  | 31  | 15  | 7  | 3  | 2  | 1 | 0 | 0 |
| —+— | 103 | 61  | 41  | 20  | 13  | 8  | 4  | 1  | 1 | 1 | 0 |
| —+— | 139 | 90  | 52  | 22  | 10  | 6  | 4  | 0  | 0 | 0 | 0 |
| —+— | 580 | 444 | 290 | 183 | 119 | 70 | 35 | 19 | 6 | 1 | 0 |

**Supplementary Figure 3B.**

- +— Low Baseline FVC and Low Baseline DLCO<sub>cor</sub> (n=344)
- +— Low Baseline FVC and Normal Baseline DLCO<sub>cor</sub> (n=118)
- +— Normal Baseline FVC and Low Baseline DLCO<sub>cor</sub> (n=156)
- +— Normal Baseline FVC and Normal Baseline DLCO<sub>cor</sub> (n=641)

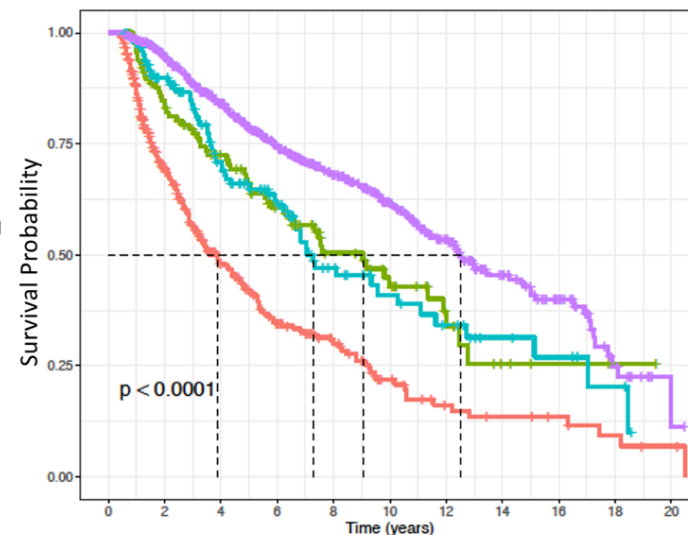

Number at risk

|     |     |     |     |     |     |     |     |    |    |    |   |
|-----|-----|-----|-----|-----|-----|-----|-----|----|----|----|---|
| —+— | 344 | 187 | 99  | 62  | 41  | 22  | 12  | 9  | 7  | 4  | 2 |
| —+— | 118 | 91  | 70  | 50  | 30  | 22  | 11  | 4  | 2  | 1  | 0 |
| —+— | 156 | 112 | 73  | 50  | 29  | 19  | 14  | 8  | 6  | 3  | 0 |
| —+— | 641 | 554 | 423 | 300 | 221 | 156 | 100 | 58 | 33 | 11 | 1 |
