# Supplementary material
Source: HighWire-hosted journal article supplement (https://erj.ersjournals.com/content/59/1/2003639)
Supplement: inline-supplementary-material-5 [file inline-supplementary-material-5.pdf]

**Supplementary Table S3A. Multivariable landmark analysis measuring the association between low Baseline DLCO<sub>cor</sub> and CLAD at 2-year landmark time point. Analysis includes: 1. Without adjustment for spirometric decline, 2. Adjustment for low baseline FEV<sub>1</sub> and 3. Adjustment for low baseline FVC.**

| Variable                          | Multivariable without FEV or FVC, HR (95%CI) | P value | Multivariable with FEV <sub>1</sub> , HR (95%CI) | P value | Multivariable with FVC, HR (95%CI) | P value |
|-----------------------------------|----------------------------------------------|---------|--------------------------------------------------|---------|------------------------------------|---------|
| Low Baseline DLCO <sub>cor</sub>  | 1.44 (1.12-1.84)                             | 0.004   | 1.28 (0.98-1.66)                                 | 0.07    | 1.23 (0.94-1.61)                   | 0.13    |
| Recipient Age (5-units)           | 0.97 (0.91-1.03)                             | 0.29    | 0.99 (0.93-1.05)                                 | 0.76    | 0.98 (0.92-1.04)                   | 0.53    |
| Donor Age (5-units)               | 1.02 (0.98-1.06)                             | 0.35    | 1.01 (0.98-1.05)                                 | 0.48    | 1.02 (0.99-1.06)                   | 0.23    |
| Native Lung Disease               |                                              |         |                                                  |         |                                    |         |
| - COPD                            | 1.23 (0.85-1.79)                             | 0.27    | 1.28 (0.88-1.86)                                 | 0.20    | 1.35 (0.92-1.97)                   | 0.13    |
| - Cystic Fibrosis                 | 1.01 (0.68-1.49)                             | 0.97    | 1.11 (0.75-1.65)                                 | 0.60    | 1.13 (0.76-1.68)                   | 0.55    |
| - ILD                             | 0.78 (0.54-1.13)                             | 0.19    | 0.75 (0.52-1.09)                                 | 0.13    | 0.80 (0.55-1.16)                   | 0.24    |
| - Other                           | Reference                                    |         |                                                  |         |                                    |         |
| Sex-Matching (Recipient/Donor)    |                                              |         |                                                  |         |                                    |         |
| - F/M                             | 1.10 (0.74-1.63)                             | 0.63    | 1.06 (0.72-1.58)                                 | 0.76    | 1.11 (0.75-1.64)                   | 0.61    |
| - M/F                             | 1.25 (0.88-1.78)                             | 0.21    | 1.20 (0.84-1.70)                                 | 0.32    | 1.23 (0.86-1.75)                   | 0.25    |
| - M/M                             | 1.41 (1.08-1.85)                             | 0.01    | 1.35 (1.03-1.78)                                 | 0.03    | 1.41 (1.08-1.85)                   | 0.01    |
| - F/F                             | Reference                                    |         |                                                  |         |                                    |         |
| CMV Sero-Status (Donor/Recipient) |                                              |         |                                                  |         |                                    |         |
| - D+/R-                           | 1.63 (1.16-2.27)                             | 0.005   | 1.59 (1.13-2.22)                                 | 0.007   | 1.59 (1.14-2.23)                   | 0.007   |
| - D+                              | 1.47 (1.10-1.97)                             | 0.009   | 1.44 (1.08-1.93)                                 | 0.01    | 1.49 (1.12-2.00)                   | 0.007   |
| - D-/R-                           | Reference                                    |         |                                                  |         |                                    |         |
| Transplant Era                    |                                              |         |                                                  |         |                                    |         |
| - 2010-2018                       | 0.83 (0.65-1.06)                             | 0.13    | 0.84 (0.66-1.07)                                 | 0.15    | 0.83 (0.66-1.06)                   | 0.14    |
| - 1998-2009                       | Reference                                    |         |                                                  |         |                                    |         |
| A Score                           | 1.26 (0.87-1.83)                             | 0.23    | 1.33 (0.91-1.94)                                 | 0.14    | 1.37 (0.94-2.00)                   | 0.11    |
| B Score                           | 1.01 (0.66-1.55)                             | 0.97    | 1.03 (0.67-1.59)                                 | 0.88    | 1.00 (0.65-1.54)                   | 0.99    |
| Low baseline FEV <sub>1</sub>     |                                              |         | 1.41 (1.07-1.85)                                 | 0.01    |                                    |         |
| Low baseline FVC                  |                                              |         |                                                  |         | 1.51 (1.15-1.98)                   | 0.003   |

**Abbreviations: CLAD = chronic lung allograft dysfunction; COPD = chronic obstructive pulmonary disease; CMV = cytomegalovirus; D+/R- = donor CMV seropositive, recipient seronegative; F = female, M = male.**

**Supplementary Table S3B. Multivariable landmark analysis measuring the association between low Baseline DLCO<sub>cor</sub> and death at 2-year landmark time point. Analysis includes: 1. Without adjustment for spirometric decline, 2. Adjustment for low baseline FEV<sub>1</sub> and 3. Adjustment for low baseline FVC.**

| Variable                          | Multivariable without FEV or FVC, HR (95%CI) | P value | Multivariable with FEV <sub>1</sub> , HR (95%CI) | P value | Multivariable with FVC, HR (95%CI) | P value |
|-----------------------------------|----------------------------------------------|---------|--------------------------------------------------|---------|------------------------------------|---------|
| Low Baseline DLCO <sub>cor</sub>  | 2.06 (1.60-2.66)                             | <0.001  | 1.68 (1.27-2.20)                                 | <0.001  | 1.68 (1.27-2.20)                   | <0.001  |
| Recipient Age (5-units)           | 1.01 (0.95-1.08)                             | 0.68    | 1.05 (0.98-1.12)                                 | 0.17    | 1.03 (0.96-1.09)                   | 0.45    |
| Donor Age (5-units)               | 0.99 (0.95-1.03)                             | 0.61    | 0.98 (0.94-1.02)                                 | 0.30    | 1.00 (0.96-1.03)                   | 0.82    |
| Native Lung Disease               |                                              |         |                                                  |         |                                    |         |
| - COPD                            | 1.11 (0.74-1.65)                             | 0.62    | 1.19 (0.80-1.78)                                 | 0.39    | 1.23 (0.82-1.85)                   | 0.31    |
| - Cystic Fibrosis                 | 0.94 (0.61-1.43)                             | 0.76    | 1.07 (0.70-1.64)                                 | 0.76    | 1.06 (0.69-1.63)                   | 0.79    |
| - ILD                             | 0.95 (0.65-1.40)                             | 0.81    | 0.91 (0.62-1.34)                                 | 0.63    | 1.01 (0.69-1.49)                   | 0.96    |
| - Other                           | Reference                                    |         | Reference                                        |         | Reference                          |         |
| Sex-Matching (Recipient/Donor)    |                                              |         |                                                  |         |                                    |         |
| - F/M                             | 1.09 (0.71-1.65)                             | 0.70    | 0.99 (0.65-1.52)                                 | 0.98    | 1.11 (0.73-1.69)                   | 0.64    |
| - M/F                             | 1.15 (0.79-1.66)                             | 0.46    | 1.04 (0.72-1.51)                                 | 0.83    | 1.11 (0.77-1.61)                   | 0.58    |
| - M/M                             | 1.56 (1.17-2.08)                             | 0.003   | 1.43 (1.07-1.92)                                 | 0.01    | 1.56 (1.17-2.08)                   | 0.003   |
| - F/F                             | Reference                                    |         | Reference                                        |         | Reference                          |         |
| CMV Sero-Status (Donor/Recipient) |                                              |         |                                                  |         |                                    |         |
| - D+/R-                           | 2.14 (1.53-3.01)                             | <0.001  | 2.10 (1.49-2.94)                                 | <0.001  | 2.09 (1.49-2.93)                   | <0.001  |
| - D+                              | 1.26 (0.92-1.73)                             | 0.15    | 1.23 (0.90-1.69)                                 | 0.20    | 1.29 (0.94-1.77)                   | 0.11    |
| - D-/R-                           | Reference                                    |         | Reference                                        |         | Reference                          |         |
| Transplant Era                    |                                              |         |                                                  |         |                                    |         |
| - 2010-2018                       | 0.82 (0.63-1.07)                             | 0.14    | 0.83 (0.64-1.08)                                 | 0.16    | 0.81 (0.62-1.06)                   | 0.12    |
| - 1998-2009                       | Reference                                    |         | Reference                                        |         | Reference                          |         |
| A Score                           | 0.88 (0.59-1.31)                             | 0.53    | 0.93 (0.62-1.39)                                 | 0.72    | 0.95 (0.63-1.42)                   | 0.80    |
| B Score                           | 1.02 (0.64-1.63)                             | 0.93    | 1.09 (0.69-1.72)                                 | 0.72    | 0.98 (0.61-1.58)                   | 0.95    |
| Low baseline FEV <sub>1</sub>     |                                              |         | 1.77 (1.34-2.35)                                 | <0.001  |                                    |         |
| Low baseline FVC                  |                                              |         |                                                  |         | 1.70 (1.30-2.22)                   | <0.001  |

**Abbreviations: COPD = chronic obstructive pulmonary disease; CMV = cytomegalovirus; D+/R- = donor CMV seropositive, recipient seronegative; F = female, M = male; A Score = Sum of all A-grade cellular rejection components up time divided by the total number of biopsies up until the 2-year landmark time; B Score = Sum of all B-grade cellular rejection components up time divided by the total number of biopsies up until the 2-year landmark time.**
